# Supplementary material for: Mechanistic molecular motion of transition-metal mediated β-hydrogen transfer: quasiclassical trajectories reveal dynamically ballistic, dynamically unrelaxed, two step, and concerted mechanisms
Source: Royal Society of Chemistry journal article supplement (doi:10.1039/d0dt01687j), 2020-01-01
Supplement: d0dt01687j4.pdf [file d0dt01687j4.pdf]

## Supporting Information

### **Mechanistic Molecular Motion of Transition-Metal Mediated $\beta$ -Hydride Transfer: Quasiclassical Trajectories Reveal Dynamically Ballistic, Dynamically Unrelaxed, Two Step, and Concerted Mechanisms**

Josh Wheeler, Ryan Carlsen, and Daniel H. Ess\*

Department of Chemistry and Biochemistry, Brigham Young University, Provo, Utah 84602  
(USA)

## Table of Contents

*Absolute Energies*

S2

**Table S1.** M06/6-31G\*\*[LANL2DZ for Co, Rh, and Ir] and M06/Def2-TZVPD absolute and relative energies. In the main manuscript, all reported structures and energies are for M06/6-31G\*\*[LANL2DZ]. The geometry-optimized Def2-TZVPD electronic and free energies reported below are for basis set comparison, and were not included in the main manuscript. The Def2-TZVPD basis set is too large for direct dynamics trajectories.

| Rhodium                      |             |             |             |             |                       |                        |
|------------------------------|-------------|-------------|-------------|-------------|-----------------------|------------------------|
| M06                          |             |             |             |             |                       |                        |
| Absolute Energy (a.u.)       |             |             |             |             |                       |                        |
| Structure                    | Electronic  | ZPE         | Enthalpy    | Free Energy | Def2-TZVPD Electronic | Def2-TZVPD Free Energy |
| <b>1Rh</b>                   | -656.806618 | -656.466730 | -656.446016 | -656.512414 | -658.080913           | -657.786709            |
| <b>TS1Rh</b>                 | -656.791761 | -656.455685 | -656.435046 | -656.501536 | -658.068218           | -657.777993            |
| <b>2Rh</b>                   | -656.793598 | -656.456314 | -656.435418 | -656.502127 | -658.069602           | -657.778131            |
| <b>C-C Rotation</b>          | -656.799287 | -656.460258 | -656.439502 | -656.506519 | -658.070836           | -657.778068            |
| Relative Energies (kcal/mol) |             |             |             |             |                       |                        |
| <b>1Rh</b>                   | 0.0         | 0.0         | 0.0         | 0.0         | 0.0                   | 0.0                    |
| <b>TS1Rh</b>                 | 9.3         | 6.9         | 6.9         | 6.8         | 8.0                   | 5.5                    |
| <b>2Rh</b>                   | 8.2         | 6.5         | 6.7         | 6.5         | 7.1                   | 5.4                    |
| <b>C-C Rotation</b>          | 4.6         | 4.1         | 4.1         | 3.7         | 6.3                   | 5.4                    |
| MN15                         |             |             |             |             |                       |                        |
| Absolute Energy (a.u.)       |             |             |             |             |                       |                        |
| <b>1Rh</b>                   | -656.322784 | -655.979153 | -655.958670 | -656.024530 | -657.613328           | -657.315073            |
| <b>TS1Rh</b>                 | -656.312908 | -655.972334 | -655.952093 | -656.017477 | -657.604851           | -657.309419            |
| <b>2Rh</b>                   | -656.316060 | -655.974421 | -655.953746 | -656.020420 | -657.607354           | -657.311714            |
| Relative Energies (kcal/mol) |             |             |             |             |                       |                        |
| <b>1Rh</b>                   | 0.0         | 0.0         | 0.0         | 0.0         | 0.0                   | 0.0                    |
| <b>TS1Rh</b>                 | 6.2         | 4.3         | 4.1         | 4.4         | 5.3                   | 3.5                    |
| <b>2Rh</b>                   | 4.2         | 3.0         | 3.1         | 2.6         | 3.7                   | 2.1                    |
| $\omega$ B97X-D              |             |             |             |             |                       |                        |
| Absolute Energy (a.u.)       |             |             |             |             |                       |                        |
| <b>1Rh</b>                   | -657.105463 | -656.759283 | -656.738917 | -656.804992 | -658.387472           | -658.087001            |
| <b>TS1Rh</b>                 | -657.094007 | -656.750737 | -656.730659 | -656.796059 | -658.378756           | -658.080808            |
| <b>2Rh</b>                   | -657.096268 | -656.751854 | -656.731435 | -656.797915 | -658.380404           | -658.082051            |
| Relative Energies (kcal/mol) |             |             |             |             |                       |                        |
| <b>1Rh</b>                   | 0.0         | 0.0         | 0.0         | 0.0         | 0.0                   | 0.0                    |
| <b>TS1Rh</b>                 | 7.2         | 5.4         | 5.2         | 5.6         | 5.5                   | 3.9                    |
| <b>2Rh</b>                   | 5.8         | 4.7         | 4.7         | 4.4         | 4.4                   | 3.1                    |
| Cobalt                       |             |             |             |             |                       |                        |
| M06                          |             |             |             |             |                       |                        |
| Absolute Energy (a.u.)       |             |             |             |             |                       |                        |

| Structure                    | Electronic   | ZPE         | Enthalpy    | Free Energy | Def2-TZVPD<br>Electronic | Def2-TZVPD<br>Free Energy |
|------------------------------|--------------|-------------|-------------|-------------|--------------------------|---------------------------|
| <b>1Co</b>                   | -692.372691  | -692.031560 | -692.011432 | -692.075882 | -1930.215989             | -1929.91918               |
| <b>2Co</b>                   | -692.356409  | -692.018815 | -691.999699 | -692.061400 | -1930.199988             | -1929.904979              |
| Relative Energies (kcal/mol) |              |             |             |             |                          |                           |
| <b>1Co</b>                   | 0.0          | 0.0         | 0.0         | 0.0         | 0.0                      | 0.0                       |
| <b>2Co</b>                   | 10.2         | 8.0         | 7.4         | 9.1         | 10.0                     | 8.9                       |
| $\omega$ B97X-D              |              |             |             |             |                          |                           |
| Absolute Energy (a.u.)       |              |             |             |             |                          |                           |
| <b>1Co</b>                   | -692.636687  | -692.289074 | -692.269207 | -692.333361 | -1930.575728             | -1930.272402              |
| <b>2Co</b>                   | -692.621114  | -692.277123 | -692.257488 | -692.320845 | -1930.561800             | -1930.261532              |
| Relative Energies (kcal/mol) |              |             |             |             |                          |                           |
| <b>1Co</b>                   | 0.0          | 0.0         | 0.0         | 0.0         | 0.0                      | 0.0                       |
| <b>2Co</b>                   | 9.8          | 7.5         | 7.4         | 7.9         | 8.7                      | 6.8                       |
| <b>Iridium</b>               |              |             |             |             |                          |                           |
| M06                          |              |             |             |             |                          |                           |
| Absolute Energy (a.u.)       |              |             |             |             |                          |                           |
| Structure                    | Electronic   | ZPE         | Enthalpy    | Free Energy | Def2-TZVPD<br>Electronic | Def2-TZVPD<br>Free Energy |
| <b>1Ir</b>                   | -651.977051  | -651.636556 | -651.616128 | -651.682439 | -651.872166              | -651.5775547              |
| <b>TS1Ir</b>                 | -651.970097  | -651.632421 | -651.612398 | -651.677884 | -651.865801              | -651.5735878              |
| <b>2Ir</b>                   | -651.976711  | -651.637766 | -651.617313 | -651.683714 | -651.870828              | -651.5778312              |
| Relative Energies (kcal/mol) |              |             |             |             |                          |                           |
| <b>1Ir</b>                   | 0.0          | 0.0         | 0.0         | 0.0         | 0.0                      | 0.0                       |
| <b>TS1Ir</b>                 | 4.4          | 2.6         | 2.3         | 2.9         | 4.0                      | 2.5                       |
| <b>2Ir</b>                   | 0.2          | -0.8        | -0.7        | -0.8        | 0.8                      | -0.2                      |
| MN15                         |              |             |             |             |                          |                           |
| Absolute Energy (a.u.)       |              |             |             |             |                          |                           |
| <b>1Ir</b>                   | -651.5332167 | -651.189949 | -651.169699 | -651.236067 | -651.4755014             | -651.1766898              |
| <b>TS1Ir</b>                 | -651.524333  | -651.182629 | -651.162696 | -651.228560 | -651.472335              | -651.176562               |
| <b>2Ir</b>                   | -651.533217  | -651.189949 | -651.169699 | -651.236067 | -651.479212              | -651.182063               |
| Relative Energies (kcal/mol) |              |             |             |             |                          |                           |
| <b>1Ir</b>                   | 0.0          | 0.0         | 0.0         | 0.0         | 0.0                      | 0.0                       |
| <b>TS1Ir</b>                 | 2.4          | 0.9         | 0.8         | 0.5         | 2.0                      | 0.1                       |
| <b>2Ir</b>                   | -3.2         | -3.7        | -3.6        | -4.2        | -2.3                     | -3.4                      |
| $\omega$ B97X-D              |              |             |             |             |                          |                           |
| Absolute Energy (a.u.)       |              |             |             |             |                          |                           |
| <b>1Ir</b>                   | -652.306923  | -651.960367 | -651.940364 | -652.005808 | -652.213929              | -651.912814               |
| <b>TS1Ir</b>                 | -652.303219  | -651.958711 | -651.939084 | -652.004053 | -652.210405              | -651.911239               |
| Relative Energies (kcal/mol) |              |             |             |             |                          |                           |
| <b>1Ir</b>                   | 0.0          | 0.0         | 0.0         | 0.0         | 0.0                      | 0.0                       |
| <b>TS1Ir</b>                 | 2.3          | 1.0         | 0.8         | 1.1         | 2.2                      | 1.0                       |
